# Supplementary material for: Disparities in healthcare in psoriatic arthritis: an analysis of 439 patients from 13 countries
Source: HighWire-hosted journal article supplement (doi:10.1136/rmdopen-2021-002031), 2022-05-01
Supplement: rmdopen-2021-002031supp001_data_supplement.pdf [file rmdopen-2021-002031supp001_data_supplement.pdf]

**Supplementary Table 1. Mean DAPSA for PsA patients according to country**

| Tertile             | Lowest country GDP/capita |                                 |                   |                  |                   |                    |
|---------------------|---------------------------|---------------------------------|-------------------|------------------|-------------------|--------------------|
| Country             | Brazil<br>(N=29)          | Russian<br>Federation<br>(N=20) | Romania<br>(N=24) | Turkey<br>(N=19) | Estonia<br>(N=22) | Overall<br>(N=114) |
| DAPSA, mean<br>(SD) | 24.0 (29.4)               | 31.7 (23.4)                     | 19.6 (15.9)       | 16.1 (8.8)       | 14.1 (7.8)        | 21.2 (20.4)        |

| Tertile             | Middle country GDP/capita |                 |              |                  |                    |
|---------------------|---------------------------|-----------------|--------------|------------------|--------------------|
| Country             | Spain<br>(N=30)           | Italy<br>(N=45) | UK<br>(N=18) | France<br>(N=89) | Overall<br>(N=182) |
| DAPSA, mean<br>(SD) | 10.3 (14.2)               | 12.8 (11.4)     | 18.6 (20.8)  | 14.0 (16.5)      | 13.6 (15.5)        |

| Tertile             | Highest country GDP/ capita |                  |                     |               |                    |
|---------------------|-----------------------------|------------------|---------------------|---------------|--------------------|
| Country             | Germany<br>(N=34)           | Canada<br>(N=39) | Singapore<br>(N=30) | USA<br>(N=40) | Overall<br>(N=143) |
| DAPSA, mean<br>(SD) | 20.7 (18.4)                 | 13.2 (11.6)      | 12.9 (11.9)         | 16.3 (14.4)   | 15.8 (14.5)        |

DAPSA: Disease Activity in Psoriatic Arthritis, PsA: Psoriatic Arthritis, GDP: Gross Domestic Product
