# Supplementary material for: Disparities in healthcare in psoriatic arthritis: an analysis of 439 patients from 13 countries
Source: PubMed Central journal article supplement (PMC9083399; doi:10.1136/rmdopen-2021-002031), 2022-05-06
Supplement: rmdopen-2021-002031supp002.pdf [file rmdopen-2021-002031supp002.pdf]

**Supplementary Table 2. Calculation of effect size comparing the lowest GDP/capita tertile to the two other tertiles**

|                                                                               | Patients in lowest country GDP/capita tertile (N=114) | Patients in middle and high country GDP/capita tertiles (N=325) | Effect size [95% CI] |
|-------------------------------------------------------------------------------|-------------------------------------------------------|-----------------------------------------------------------------|----------------------|
| DAPSA, mean (SD)                                                              | 21.2 (20.4)                                           | 14.5 (15.1)                                                     | 0.40 [0.19;0.62]     |
| Swollen joint count (0-66), mean (SD)                                         | 3.8 (11.1)                                            | 1.6 (4.8)                                                       | 0.31 [0.10;0.53]     |
| Tender joint count (0-68), mean (SD)                                          | 5.7 (10.3)                                            | 4.0 (8.4)                                                       | 0.19 [-0.02;0.40]    |
| CRP (mg/dL), mean (SD)                                                        | 1.8 (4.6)                                             | 1.5 (5.6)                                                       | 0.06 [-0.16;0.27]    |
| Leeds enthesitis index, mean (SD)                                             | 0.6 (1.4)                                             | 0.5 (1.3)                                                       | 0.08 [-0.14;0.29]    |
| Body surface area of psoriasis (analysed as a continuous variable), mean (SD) | 4.5 (6.8)                                             | 2.6 (4.0)                                                       | 0.39 [0.17;0.60]     |
| Physician global assessment of PsA (0-10, mean (SD))                          | 4.1 (2.5)                                             | 2.7 (2.4)                                                       | 0.58 [0.36;0.79]     |
| PsAID12, mean (SD)                                                            | 4.3 (2.4)                                             | 3.1 (2.4)                                                       | 0.50 [0.28;0.72]     |
| Patient global assessment of PsA (0-10), mean (SD)                            | 5.1 (2.6)                                             | 3.7 (2.9)                                                       | 0.49 [0.28;0.71]     |
| HAQ (0-3), mean (SD)                                                          | 0.9 (0.7)                                             | 0.6 (0.6)                                                       | 0.48 [0.26;0.69]     |

PsA: Psoriatic Arthritis, GDP: Gross Domestic Product, MDA: Minimal Disease Activity, DAPSA: Disease Activity in Psoriatic Arthritis, PsAID: PsA Impact of Disease questionnaire, HAQ: Health Assessment Questionnaire.

Lowest country GDP/capita tertile: Brazil, Turkey, Russian Federation, Romania, Estonia; middle tertile: Spain, Italy, UK, France; highest tertile: Canada, Germany, USA and Singapore.

95% CI: 95% Confidence Interval
