# Supplementary material for: Disparities in healthcare in psoriatic arthritis: an analysis of 439 patients from 13 countries
Source: HighWire-hosted journal article supplement (doi:10.1136/rmdopen-2021-002031), 2022-05-01
Supplement: rmdopen-2021-002031supp003_data_supplement.pdf [file rmdopen-2021-002031supp003_data_supplement.pdf]

### Supplementary Table 3. Missing data for key outcomes in each tertile of GDP/capita

#### A) In 439 patients (disease activity population)

|                                                  | Patients in lowest country GDP/capita tertile (N=114) | Patients in middle country GDP/capita tertile (N=182) | Patients in highest country GDP/capita tertile (N=143) |
|--------------------------------------------------|-------------------------------------------------------|-------------------------------------------------------|--------------------------------------------------------|
| MDA state attained, n (%)                        | 0                                                     | 0                                                     | 0                                                      |
| DAPSA remission, n (%)                           | 0                                                     | 0                                                     | 0                                                      |
| DAPSA, n (%)                                     | 0                                                     | 0                                                     | 0                                                      |
| Swollen joint count (0-66), n (%)                | 0                                                     | 0                                                     | 0                                                      |
| Tender joint count (0-68), n (%)                 | 0                                                     | 0                                                     | 0                                                      |
| Current dactylitis, n (%)                        | 1 (0.9)                                               | 3 (1.6)                                               | 4 (2.8)                                                |
| Leeds enthesitis index, n (%)                    | 0                                                     | 0                                                     | 0                                                      |
| Body surface area of psoriasis $\geq$ 5%, n (%)  | 0                                                     | 0                                                     | 0                                                      |
| Elevated C-reactive protein (CRP>5mg/L), n (%)   | 0                                                     | 0                                                     | 0                                                      |
| Physician global assessment of PsA (0-10), n (%) | 0                                                     | 0                                                     | 0                                                      |
| PsAID12 (0-10), n (%)                            | 0                                                     | 0                                                     | 1 (0.9)                                                |
| Patient global assessment of PsA (0-10), n (%)   | 0                                                     | 0                                                     | 0                                                      |
| HAQ (0-3), n (%)                                 | 0                                                     | 0                                                     | 0                                                      |

#### B) In 410 patients (treatment population)

|                                 | Patients in lowest country GDP/capita tertile (N=101) | Patients in middle country GDP/capita tertile (N=180) | Patients in highest country GDP/capita tertile (N=129) |
|---------------------------------|-------------------------------------------------------|-------------------------------------------------------|--------------------------------------------------------|
| bDMARDs use, n (%)              | 0                                                     | 0                                                     | 0                                                      |
| csDMARDs use, n (%)             | 9 (8.9)                                               | 10 (5.6)                                              | 5 (3.9)                                                |
| Methotrexate use, n (%)         | 11 (10.9)                                             | 10 (5.6)                                              | 6 (4.7)                                                |
| Oral glucocorticoids use, n (%) | 19 (18.8)                                             | 16 (8.9)                                              | 9 (7.0)                                                |
